# Supplementary material for: A Randomized Prospective Study Comparing Anti–T-Lymphocyte Igs to Basiliximab in Highly Sensitized Kidney Transplant Patients
Source: PubMed Central journal article supplement — Kidney Int Rep. 2020 Jun 2;5(8):1207–17. doi: 10.1016/j.ekir.2020.05.020 (PMC7403559; doi:10.1016/j.ekir.2020.05.020), 2020-06-02
Supplement: mmc1.pdf [file mmc1.pdf]

### Supplementary Figure 1

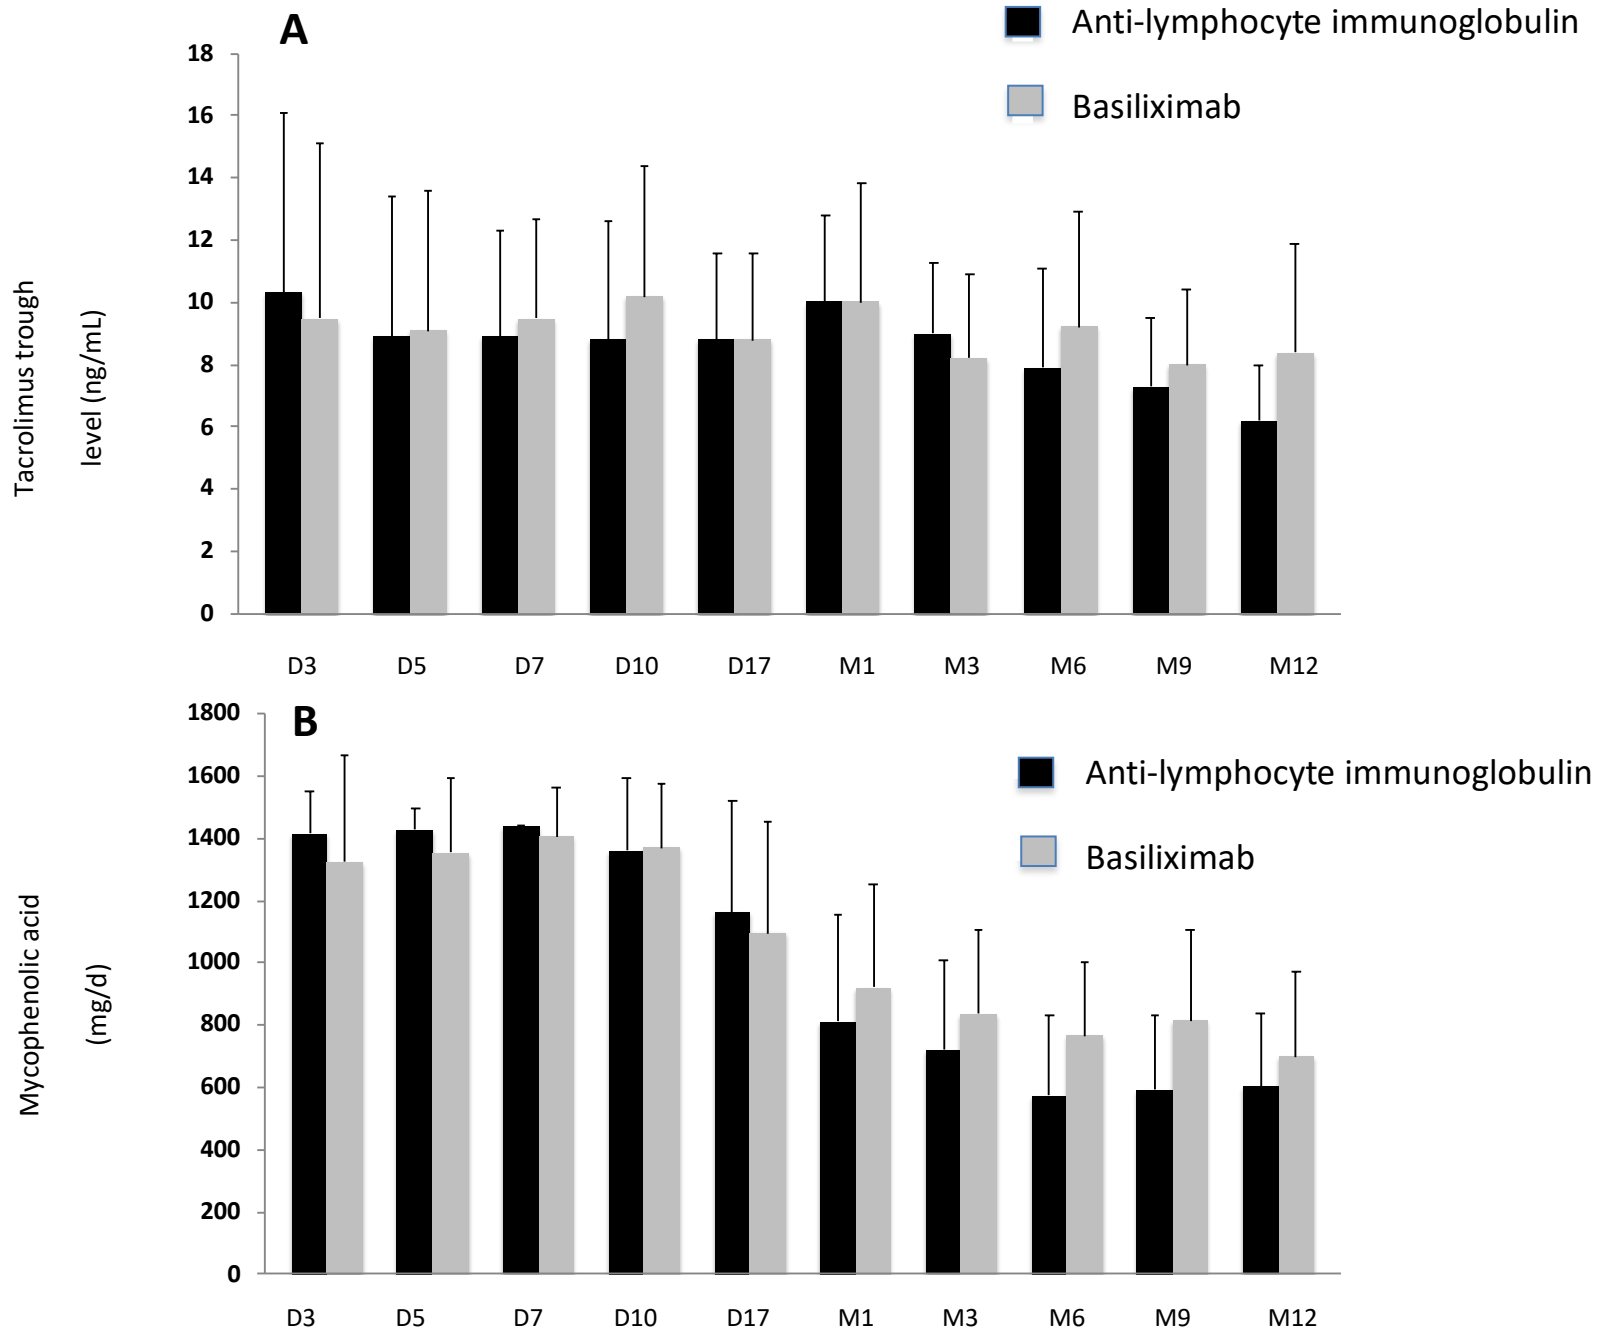

**CONSORT 2010 checklist for clinical trials**

| Section /Topic                                       | Item No | Checklist Item                                                                                                                                                                              | Reported on Page No |
|------------------------------------------------------|---------|---------------------------------------------------------------------------------------------------------------------------------------------------------------------------------------------|---------------------|
| <b>Title and abstract</b>                            |         |                                                                                                                                                                                             |                     |
|                                                      | 1a      | Identification as a randomised trial in the title                                                                                                                                           | 1                   |
|                                                      | 1b      | Structured summary of trial design, methods, results and conclusions (for specific guidance see CONSORT for abstracts [21,31])                                                              | 4                   |
| <b>Introduction</b>                                  |         |                                                                                                                                                                                             |                     |
| Background and objectives                            | 2a      | Scientific background and explanation of rationale                                                                                                                                          | 5                   |
|                                                      | 2b      | Specific objectives or hypotheses                                                                                                                                                           | 5                   |
| <b>Methods</b>                                       |         |                                                                                                                                                                                             |                     |
| Trial design                                         | 3a      | Description of trial design (such as parallel, factorial) including allocation ratio                                                                                                        | 13                  |
|                                                      | 3b      | Important changes to methods after trial commencement (such as eligibility criteria), with reasons                                                                                          | 13                  |
| Participations                                       | 4a      | Eligibility criteria for participants                                                                                                                                                       | 13                  |
|                                                      | 4b      | Settings and locations where the data were collected                                                                                                                                        | 13                  |
| Interventions                                        | 5       | The interventions for each group with sufficient details to allow replication, including how and when they were actually administered                                                       | N/A                 |
| Outcomes                                             | 6a      | Completely defined pre-specified primary and secondary outcome measures, including how and when they were assessed                                                                          | 14                  |
|                                                      | 6b      | Any changes to trial outcomes after the trial commenced, with reasons                                                                                                                       | N/A                 |
| Sample size                                          | 7a      | How sample size was determined                                                                                                                                                              |                     |
|                                                      | 7b      | When applicable, explanation of any interim analyses and stopping guidelines                                                                                                                | N/A                 |
| <b>Randomisation</b>                                 |         |                                                                                                                                                                                             |                     |
| Sequence generation                                  | 8a      | Method used to generate the random allocation sequence                                                                                                                                      | 13                  |
|                                                      | 8b      | Type of randomisation, details of any restriction (such as blocking and block size)                                                                                                         | 13                  |
| Allocation concealment mechanism                     | 9       | Mechanism used to implement the random allocation sequence (such as sequentially numbered containers), describing any steps taken to conceal the sequence until interventions were assigned | 13                  |
| Implementation                                       | 10      | Who generated the random allocation sequence, who enrolled participants, and who assigned participants to interventions                                                                     | 13                  |
| Blinding                                             | 11a     | If done, who was blinded after assignment to interventions (for example, participants, care providers, those assessing outcomes) and how                                                    | 13                  |
|                                                      | 11b     | If relevant, description of the similarity of interventions                                                                                                                                 | N/A                 |
| Statistical methods                                  | 12a     | Statistical methods used to compare groups for primary and secondary outcomes                                                                                                               | 15                  |
|                                                      | 12b     | Methods for additional analyses, such as subgroup analyses and adjusted analyses                                                                                                            | 15                  |
| <b>Results</b>                                       |         |                                                                                                                                                                                             |                     |
| Participant flow (a diagram is strongly recommended) | 13a     | For each group, the numbers of participants who were randomly assigned, received intended treatment, and were analysed for primary outcome                                                  | Fig 1               |

|                          |     |                                                                                                                                                    |                                                                         |
|--------------------------|-----|----------------------------------------------------------------------------------------------------------------------------------------------------|-------------------------------------------------------------------------|
|                          | 13b | For each group, losses and exclusions after randomisation, together with reasons                                                                   | Fig 1                                                                   |
| Recruitment              | 14a | Dates defining the periods of recruitment and follow-up                                                                                            | 12                                                                      |
|                          | 14b | Why the trial ended or was stopped                                                                                                                 | N/A                                                                     |
| Baseline data            | 15  | A table showing baseline demographic and clinical characteristics for each group                                                                   | 19                                                                      |
| Number analysed          | 16  | For each group, number of participants (denominator) included in each analysis and whether the analysis was by original assigned groups            | Figure 1                                                                |
| Outcomes and estimation  | 17a | For each primary and secondary outcomes, results for each group, and the estimated effect size and its precision (such as 95% confidence interval) | P6 to 8 and Tables 1, 2, 3                                              |
|                          | 17b | For binary outcomes, presentation of both absolute and relative effect sizes in recommended                                                        | N/A                                                                     |
| Ancillary analyses       | 18  | Results of any other analyses perform, including subgroup analyses and adjusted analyses, distinguishing pre-specified from exploratory            | N/A                                                                     |
| Harms                    | 19  | All important harms or unintended effects in each group (for specific guidance see CONSORT for harms [28])                                         | N/A                                                                     |
| <b>Discussion</b>        |     |                                                                                                                                                    |                                                                         |
| Limitations              | 20  | Trial limitations, addressing sources of potential bias, imprecision, and, if relevant, multiplicity of analyses                                   | 12                                                                      |
| Generalisability         | 21  | Generalisability (external validity, applicability) of trial findings                                                                              | 12                                                                      |
| Interpretation           | 22  | Interpretation consistent with results, balancing benefits and harms, and considering other relevant evidence                                      | 12                                                                      |
| <b>Other information</b> |     |                                                                                                                                                    |                                                                         |
| Registration             | 23  | Registration number and name of trial registry                                                                                                     | 12                                                                      |
| Protocol                 | 24  | Where the full trial protocol can be accessed, if available                                                                                        | Available on <a href="http://clinicaltrials.gov">clinicaltrials.gov</a> |
| Funding                  | 25  | Sources of funding and other support (such as supply of drugs), role of funders                                                                    | 2                                                                       |
|                          |     |                                                                                                                                                    |                                                                         |
